# Supplementary material for: The inhibition of monocarboxylate transporter 2 (MCT2) by AR-C155858 is modulated by the associated ancillary protein
Source: PubMed Central journal article supplement — Biochem J. 2010 Sep 28;431(Pt 2):217–25. doi: 10.1042/BJ20100890 (PMC2947196; doi:10.1042/bj20100890), 2010-09-28
Supplement: bj4310217add.pdf [file bj4310217add.pdf]

SUPPLEMENTARY ONLINE DATA

The inhibition of monocarboxylate transporter 2 (MCT2) by AR-C155858 is modulated by the associated ancillary protein

Matthew J. OVENS\*, Christine MANOHARAN\*, Marieangela C. WILSON\*, Clare M. MURRAY† and Andrew P. HALESTRAP\*<sup>1</sup>

\*Department of Biochemistry, School of Medical Sciences, University of Bristol, University Walk, Bristol BS8 1TD, U.K., and †Bioscience Department, AstraZeneca R&D Charnwood, Bakewell Road, Loughborough, Leics. LE11 5RH, U.K.

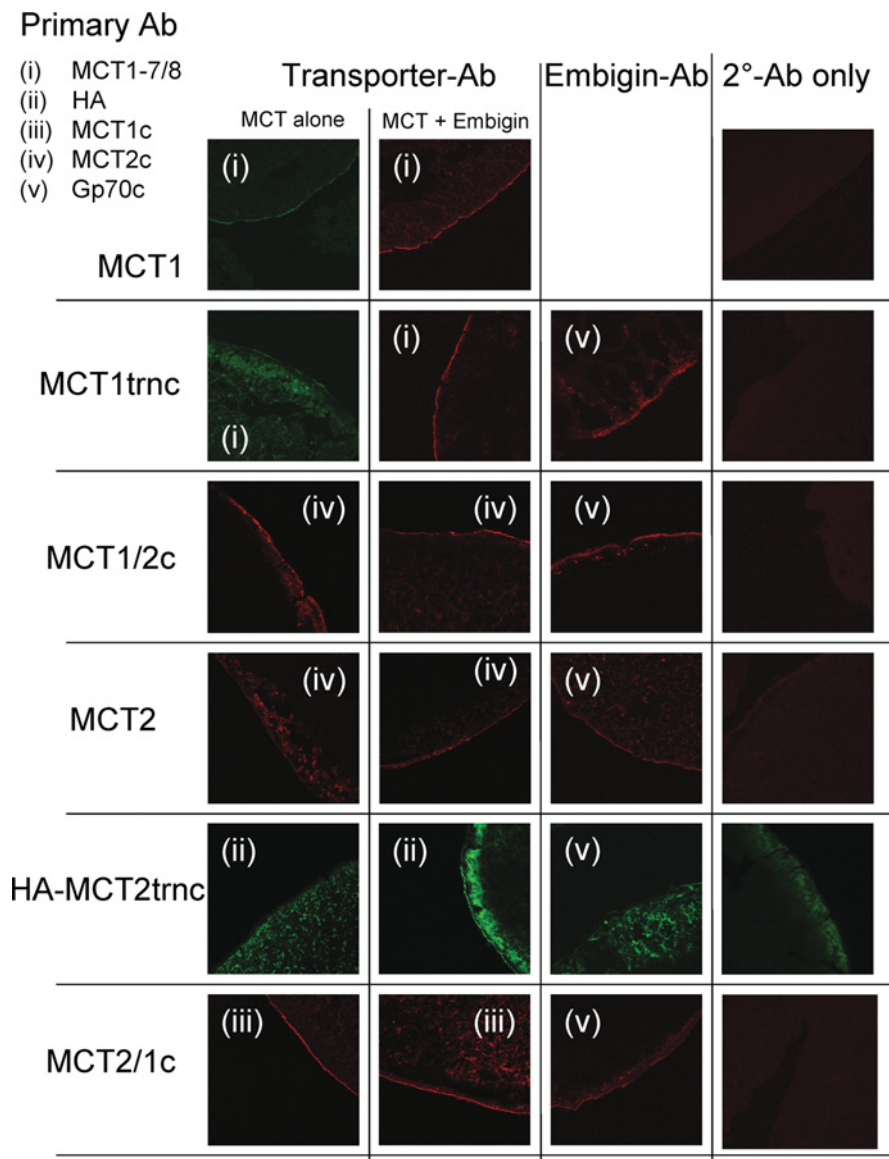

Figure S1 Immunofluorescent confocal microscopy of *Xenopus* oocyte sections expressing the various MCT constructs in the presence and absence of exogenous embigin

Ab, antibody; 2°, secondary.

<sup>1</sup> To whom correspondence should be addressed (email a.halestrap@bristol.ac.uk).

**Table S1 Primers used in PCR generation of chimaeric MCTs and for detecting *X. laevis* basigin and embigin expression**

| Construct  |                        | Forward primer (5'→3')         | Reverse primer (5'→3')       |
|------------|------------------------|--------------------------------|------------------------------|
| MCT1/2     | MCT1 fragment          | TCTTGAATTCATCGACACCT           | CAAAAAGCCTCTATGGGTAA         |
|            | MCT2 fragment          | TTTACCCATAGAGGCTTTTTG          | TGATTCGGAGATGAGACTT          |
| MCT2/1     | MCT1 fragment          | TTTACCCATAGAGGCTTTTTG          | ACACAAATGCCACTGTCT           |
|            | MCT2 fragment          | TCCAGAATTCGCTCAGAAATGCCATCAGAG | CAAAAAGCCTCTATGGGTAA         |
| MCT1/2c    | MCT1 fragment          | TCTTGAATTCATCGACACCT           | AAGTCGATAATTGATGCC           |
|            | MCT2 fragment          | ATCAATTATCGACTTCTCGAGAAGG      | TGATTCGGAGATGAGACTT          |
| MCT2/1c    | MCT1 fragment          | ATCAATTATCGACTTGTGGCC          | ACACAAATGCCACTGTCT           |
|            | MCT2 fragment          | TCCAGAATTCGCTCAGAAATGCCATCAGAG | AAGTCGATAATTGATAGCATTGC      |
| HA-MCT2trn | MCT2trn from pGHJ      | CAACTGGGCCCGATCAATCCCG         | CCATTGGGTGTTCTTGAGGCTGG      |
|            | MCT2trn from HA-pcDNA3 | CCCAATCTAGATAGCTTACCATGTACCC   | CGGCCCTCTAGAGAATTCACTAGTGA   |
| Basigin    | <i>Xenopus</i> basigin | GATCCAGATATTACAACAATG          | GCATTAGGAGAAACAATGTACC       |
| Embigin    | <i>Xenopus</i> embigin | GTGATAGTCCAAGTACAACCCAATCG     | CAACACTACTGCTCTCCTCCGATTTAGG |

Received 22 June 2010/30 July 2010; accepted 9 August 2010

Published as BJ Immediate Publication 9 August 2010, doi:10.1042/BJ20100890
